# Supplementary material
Source: publisher site journal article supplement (https://www.degruyterbrill.com/publication/isbn/9783110261592/downloadAsset/9783110261592_Inhaltsverzeichnis.pdf)
Supplement: Supplementary file 1 [file 9783110261592_Inhaltsverzeichnis.pdf]

# Inhaltsverzeichnis

## Teilband 1

|                                                                                                           |     |
|-----------------------------------------------------------------------------------------------------------|-----|
| Vorwort . . . . .                                                                                         | V   |
| Aufbau und Editorische Grundsätze der<br><i>Ernst Troeltsch · Kritische Gesamtausgabe</i> . . . . .       | XV  |
| Siglen, Zeichen, Abkürzungen . . . . .                                                                    | XXI |
| Einleitung . . . . .                                                                                      | 1   |
| I. Zum biographischen Kontext . . . . .                                                                   | 3   |
| II. Zum werkgeschichtlichen Kontext . . . . .                                                             | 9   |
| III. Systematische Grundlegung der Religionswissenschaft und<br>Religionsphilosophie . . . . .            | 13  |
| IV. Konkretionen der tatsächlichen Religion: Ethische Stellung-<br>nahmen in Debatten und Reden . . . . . | 27  |
| Zwei Thoma-Bilder in der Heidelberger Peterskirche (1903) . . . . .                                       | 51  |
| Editorischer Bericht . . . . .                                                                            | 51  |
| 1. Entstehung . . . . .                                                                                   | 51  |
| 2. Textgenese und Drucklegung . . . . .                                                                   | 54  |
| Edierter Text . . . . .                                                                                   | 55  |
| Religionswissenschaft und Theologie des 18. Jahrhunderts (1903) . .                                       | 59  |
| Editorischer Bericht . . . . .                                                                            | 59  |
| 1. Entstehung . . . . .                                                                                   | 59  |

|                                                                                                         |     |
|---------------------------------------------------------------------------------------------------------|-----|
| 2. Textgenese und Drucklegung . . . . .                                                                 | 67  |
| Edierter Text . . . . .                                                                                 | 69  |
| Beitrag zur Umfrage zum Zusammenschluß der evangelischen Landeskirchen (1903) . . . . .                 | 97  |
| Editorischer Bericht . . . . .                                                                          | 97  |
| 1. Entstehung . . . . .                                                                                 | 97  |
| 2. Textgenese und Drucklegung . . . . .                                                                 | 100 |
| Edierter Text . . . . .                                                                                 | 102 |
| Politische Ethik und Christentum (1904) . . . . .                                                       | 105 |
| Editorischer Bericht . . . . .                                                                          | 105 |
| 1. Entstehung . . . . .                                                                                 | 105 |
| 2. Textgenese und Drucklegung . . . . .                                                                 | 118 |
| Edierter Text . . . . .                                                                                 | 134 |
| Beitrag zur Umfrage: Wie urteilen Theologen über das kirchliche Stimmrecht der Frauen? (1905) . . . . . | 197 |
| Editorischer Bericht . . . . .                                                                          | 197 |
| 1. Entstehung . . . . .                                                                                 | 197 |
| 2. Textgenese und Drucklegung . . . . .                                                                 | 201 |
| Edierter Text . . . . .                                                                                 | 203 |
| Psychologie und Erkenntnistheorie in der Religionswissenschaft (1905) . . . . .                         | 205 |
| Editorischer Bericht . . . . .                                                                          | 205 |
| 1. Entstehung . . . . .                                                                                 | 205 |
| 2. Textgenese und Drucklegung . . . . .                                                                 | 209 |
| Edierter Text . . . . .                                                                                 | 215 |
| Schiller, sein Werk und das deutsche Volk (1905) . . . . .                                              | 257 |
| Editorischer Bericht . . . . .                                                                          | 257 |
| 1. Entstehung . . . . .                                                                                 | 257 |
| 2. Textgenese und Drucklegung . . . . .                                                                 | 260 |

|                                                                                                                        |     |
|------------------------------------------------------------------------------------------------------------------------|-----|
| Edierter Text . . . . .                                                                                                | 264 |
| Thesen für den Vortrag über den „Offenbarungsbegriff in der gegenwärtigen Weltanschauung“ (1905) . . . . .             | 285 |
| Editorischer Bericht . . . . .                                                                                         | 285 |
| 1. Entstehung . . . . .                                                                                                | 285 |
| 2. Textgenese und Drucklegung . . . . .                                                                                | 289 |
| Edierter Text . . . . .                                                                                                | 290 |
| Main Problems of the Philosophy of Religion (1905) . . . . .                                                           | 293 |
| Editorischer Bericht . . . . .                                                                                         | 293 |
| 1. Entstehung . . . . .                                                                                                | 293 |
| 2. Textgenese und Drucklegung . . . . .                                                                                | 301 |
| Edierter Text . . . . .                                                                                                | 304 |
| Die Trennung von Staat und Kirche, der staatliche Religionsunterricht und die theologischen Fakultäten (1907). . . . . | 319 |
| Editorischer Bericht . . . . .                                                                                         | 319 |
| 1. Entstehung . . . . .                                                                                                | 319 |
| 2. Textgenese und Drucklegung . . . . .                                                                                | 331 |
| Edierter Text . . . . .                                                                                                | 342 |
| I. Kapitel . . . . .                                                                                                   | 344 |
| II. Kapitel . . . . .                                                                                                  | 350 |
| III. Kapitel . . . . .                                                                                                 | 366 |
| IV. Kapitel . . . . .                                                                                                  | 391 |
| V. Kapitel . . . . .                                                                                                   | 411 |
| Das Wesen des modernen Geistes (1907). . . . .                                                                         | 427 |
| Editorischer Bericht . . . . .                                                                                         | 427 |
| 1. Entstehung . . . . .                                                                                                | 427 |
| 2. Textgenese und Drucklegung . . . . .                                                                                | 429 |
| Edierter Text . . . . .                                                                                                | 434 |
| Kant bleibt im Ansatz (1907) . . . . .                                                                                 | 475 |
| Editorischer Bericht . . . . .                                                                                         | 475 |
| 1. Entstehung . . . . .                                                                                                | 475 |

|                                                                                         |     |
|-----------------------------------------------------------------------------------------|-----|
| 2. Textgenese und Drucklegung . . . . .                                                 | 478 |
| Edierter Text . . . . .                                                                 | 479 |
| Missionsmotiv, Missionsaufgabe und neuzeitliches Humanitätschristentum (1907) . . . . . | 483 |
| Editorischer Bericht . . . . .                                                          | 483 |
| 1. Entstehung . . . . .                                                                 | 483 |
| 2. Textgenese und Drucklegung . . . . .                                                 | 490 |
| Edierter Text . . . . .                                                                 | 493 |
| I. Kapitel . . . . .                                                                    | 495 |
| II. Kapitel . . . . .                                                                   | 500 |
| III. Kapitel . . . . .                                                                  | 507 |
| Autonomie und Rationalismus in der modernen Welt (1907) . . . . .                       | 517 |
| Editorischer Bericht . . . . .                                                          | 517 |
| 1. Entstehung . . . . .                                                                 | 517 |
| 2. Textgenese und Drucklegung . . . . .                                                 | 523 |
| Edierter Text . . . . .                                                                 | 525 |
| Religionsphilosophie (1907) . . . . .                                                   | 535 |
| Editorischer Bericht . . . . .                                                          | 535 |
| 1. Entstehung . . . . .                                                                 | 535 |
| 2. Textgenese und Drucklegung . . . . .                                                 | 539 |
| Edierter Text . . . . .                                                                 | 543 |
| I. Kapitel . . . . .                                                                    | 549 |
| II. Kapitel . . . . .                                                                   | 569 |
| III. Kapitel . . . . .                                                                  | 577 |
| IV. Kapitel . . . . .                                                                   | 592 |
| V. Kapitel . . . . .                                                                    | 606 |
| VI. Kapitel . . . . .                                                                   | 609 |
| Gottfried Wilhelm von Leibniz (1907) . . . . .                                          | 615 |
| Editorischer Bericht . . . . .                                                          | 615 |
| 1. Entstehung . . . . .                                                                 | 615 |
| 2. Textgenese und Drucklegung . . . . .                                                 | 617 |
| Edierter Text . . . . .                                                                 | 619 |

|                                                                                     |     |
|-------------------------------------------------------------------------------------|-----|
| Katholizismus und Reformismus (1908) . . . . .                                      | 631 |
| Editorischer Bericht . . . . .                                                      | 631 |
| 1. Entstehung . . . . .                                                             | 631 |
| 2. Textgenese und Drucklegung . . . . .                                             | 640 |
| Edierter Text . . . . .                                                             | 643 |
| David Friedrich Strauß (1908) . . . . .                                             | 657 |
| Editorischer Bericht . . . . .                                                      | 657 |
| 1. Entstehung . . . . .                                                             | 657 |
| 2. Textgenese und Drucklegung . . . . .                                             | 659 |
| Edierter Text . . . . .                                                             | 661 |
| Friedrich Naumann. Zu seinem 50. Geburtstag am morgigen<br>25. März (1910). . . . . | 673 |
| Editorischer Bericht . . . . .                                                      | 673 |
| 1. Entstehung . . . . .                                                             | 673 |
| 2. Textgenese und Drucklegung . . . . .                                             | 676 |
| Edierter Text . . . . .                                                             | 678 |
| Schleiermacher und die Kirche (1910) . . . . .                                      | 681 |
| Editorischer Bericht . . . . .                                                      | 681 |
| 1. Entstehung . . . . .                                                             | 681 |
| 2. Textgenese und Drucklegung . . . . .                                             | 682 |
| Edierter Text . . . . .                                                             | 684 |
| Religiöser Individualismus und Kirche (1910). . . . .                               | 703 |
| Editorischer Bericht . . . . .                                                      | 703 |
| 1. Entstehung . . . . .                                                             | 703 |
| 2. Textgenese und Drucklegung . . . . .                                             | 706 |
| Edierter Text . . . . .                                                             | 708 |

|                                                                                        |     |
|----------------------------------------------------------------------------------------|-----|
| Das stoisch-christliche Naturrecht und das moderne profane Naturrecht (1911) . . . . . | 711 |
| Editorischer Bericht . . . . .                                                         | 711 |
| 1. Entstehung . . . . .                                                                | 711 |
| 2. Textgenese und Drucklegung . . . . .                                                | 718 |
| Edierter Text . . . . .                                                                | 723 |
| Die Sozialphilosophie des Christentums (1911) . . . . .                                | 773 |
| Editorischer Bericht . . . . .                                                         | 773 |
| 1. Entstehung . . . . .                                                                | 773 |
| 2. Textgenese und Drucklegung . . . . .                                                | 777 |
| Edierter Text . . . . .                                                                | 779 |
| I. Die alte Kirche. . . . .                                                            | 779 |
| II. Der mittelalterliche Katholizismus. . . . .                                        | 785 |
| III. Das Luthertum . . . . .                                                           | 791 |
| IV. Der Calvinismus . . . . .                                                          | 796 |
| V. Sekten und Mystik. . . . .                                                          | 802 |
| Die Bedeutung der Geschichtlichkeit Jesu für den Glauben (1911) .                      | 809 |
| Editorischer Bericht . . . . .                                                         | 809 |
| 1. Entstehung . . . . .                                                                | 809 |
| 2. Textgenese und Drucklegung . . . . .                                                | 816 |
| Edierter Text . . . . .                                                                | 820 |
| I. Kapitel . . . . .                                                                   | 820 |
| II. Kapitel. . . . .                                                                   | 823 |
| III. Kapitel . . . . .                                                                 | 831 |
| IV. Kapitel . . . . .                                                                  | 845 |
| Unsere Gelehrten bei der Arbeit (1911) . . . . .                                       | 853 |
| Editorischer Bericht . . . . .                                                         | 853 |
| Edierter Text . . . . .                                                                | 855 |
| Erklärung zu Nr. 42 Sp. 995 (1912) . . . . .                                           | 857 |
| Editorischer Bericht . . . . .                                                         | 857 |
| Edierter Text . . . . .                                                                | 860 |

## Teilband 2

|                                                                                                   |      |
|---------------------------------------------------------------------------------------------------|------|
| Das Historische in Kants Religionsphilosophie (1904) . . . . .                                    | 861  |
| Editorischer Bericht . . . . .                                                                    | 861  |
| 1. Entstehung . . . . .                                                                           | 861  |
| 2. Textgenese und Drucklegung . . . . .                                                           | 864  |
| Edierter Text . . . . .                                                                           | 868  |
| Vorwort . . . . .                                                                                 | 868  |
| 1. Die Darstellungen von Kants Religionsphilosophie . . . . .                                     | 870  |
| 2. Kants Ausgangspunkt für die Bestimmung des Verhältnisses von Religion und Geschichte . . . . . | 892  |
| 3. Der Kompromisscharakter der Hauptschrift . . . . .                                             | 915  |
| 4. Die eigentliche Lehre Kants . . . . .                                                          | 977  |
| [Entwurf einer Ethik] . . . . .                                                                   | 1066 |
| Kunst und Religion . . . . .                                                                      | 1070 |
| Biogramme . . . . .                                                                               | 1073 |
| Literaturverzeichnis . . . . .                                                                    | 1115 |
| 1. Verzeichnis der von Ernst Troeltsch genannten Literatur. . . . .                               | 1115 |
| 2. Sonstige von den Herausgebern genannte Literatur. . . . .                                      | 1149 |
| Personenregister . . . . .                                                                        | 1221 |
| Sachregister . . . . .                                                                            | 1241 |
| Gliederung der <i>Ernst Troeltsch · Kritische Gesamtausgabe</i> . . . . .                         | 1353 |
